# Supplementary material for: The Effects of Mindfulness-Based Interventions on Children’s Executive Functions: An Updated Meta-Analysis
Source: Research Square preprint supplement (doi:10.21203/rs.3.rs-8662098/v1), 2026-01-28
Supplement: Supplementary file 1 [file 67380c6cbae4c87146a12e5c.docx]

**Supplementary Materials**

**Results on Post-test**

**Overall Effect**

**Accuracy on post-test**

Overall, 22 effect sizes were found regarding accuracy on an EF test on post-test, including 4 effect sizes that were also included in the previous meta-analysis (Takacs & Kassai, 2019). A significant, small positive effect of mindfulness interventions on children’s EF skills was found with a relatively wide confidence interval . The effect was moderately heterogeneous. When inspecting the effects on the different components of EFs, we only found a small but significant effect on measures of inhibitory control and no significant effect on cognitive flexibility or working memory, as shown in Table 1. The average effect on inhibitory control was moderately heterogeneous. The symmetrical funnel plot showed no sign of publication bias.

|  |  |  |  |  |  |  |  |  |  |
| --- | --- | --- | --- | --- | --- | --- | --- | --- | --- |
| **Table 1:** Overall and specific effect of a mindfulness intervention on children’s executive function | | | | | | | | | |
|  | **Intervention effects based on post-test** | | | | |  | **Heterogeneity** | | |
|  | **Number of contrasts (k)** | **Average effect size (g+)** | **Standard error** | **95% confidence interval** | **Significance (p)** |  | **Q value** | **p** | **I2** |
| Overall | 22 | 0.22 | 0.08 | [0.06, 0.38] | 0.007 |  | 40.10 | 0.007 | 47.63 |
| Cognitive flexibility | 13 | 0.14 | 0.10 | [-0.06, 0.35] | 0.17 |  | 22.71 | 0.03 | 47.16 |
| Inhibition | 20 | 0.23 | 0.10 | [0.04, 0.42] | 0.02 |  | 50.12 | <0.001 | 62.09 |
| Working memory | 9 | 0.26 | 0.16 | [-0.05, 0.56] | 0.10 |  | 23.95 | 0.002 | 57.84 |
|  |  |  |  |  |  |  |  |  |  |
|  |  |  |  |  |  |  |  |  |  |

**Figure 2:** Forest plot for the effect size for accuracy at post-test

**Table 2.** Subgroup Analysis for mindfulness intervention on children’s executive functions on post-test

| **Specific Effect** | | | |
| --- | --- | --- | --- |
|  | **Intervention effects based on pre-post change** |  |  |

|  | **Number of contrasts (k)** | **Average effect size (g+)** | **Standard error** | **95% confidence interval** | **Significance (p)** |  | **Q between** |
| --- | --- | --- | --- | --- | --- | --- | --- |
| **Control group** |  |  |  |  |  |  |  |
| Active | 5 | -0.11 | 0.16 | [-0.42, 0.20] | 0.47 |  | Q (1) = 5.51, p = 0.02 |
| Passive | 16 | 0.32 | 0.10 | [0.13, 0.51] | <0.001 |  |
| **Continents** |  |  |  |  |  |  |  |
| Australia | 1 | 0.35 | 0.22 | [-0.07, 0.78] | 0.1 |  | - |
| Asia | 4 | 0.65 | 0.16 | [0.33, 0.96] | <0.001 |  |
| Europe | 7 | 0.26 | 0.15 | [-0.04, 0.57] | 0.09 |  |
| North America | 10 | 0.05 | 0.10 | [-0.14, 0.24] | 0.58 |  |
| **Age Category** |  |  |  |  |  |  |  |
| Preschool | 7 | 0.36 | 0.13 | [0.12, 0.61] | 0.004 |  | Q (1) = 1.65, p = 0.20 |
| Primary school | 15 | 0.16 | 0.10 | [-0.04, 0.35] | 0.12 |  |
| **At-risk status (Clinical and SES)** |  |  |  |  |  |  |  |
| At-risk children | 6 | 0.19 | 0.18 | [-0.16, 0.54] | 0.28 |  | Q (1) = 0.03, p = 0.86 |
| Non-at-risk children | 16 | 0.23 | 0.10 | [0.04, 0.41] | 0.02 |  |
| **Recruitement** |  |  |  |  |  |  |  |
| Clinical center | 2 | 0.36 | 0.57 | [-0.76, 1.48] | 0.53 |  | - |
| School | 16 | 0.23 | 0.09 | [0.06, 0.40] | 0.01 |  |
| Population-based sample | 4 | 0.08 | 0.23 | [-0.37, 0.52] | 0.74 |  |
| **Study design** |  |  |  |  |  |  |  |
| Cluster randomization experiment | 10 | 0.11 | 0.08 | [-0.04, 0.26] | 0.14 |  | Q (1) = 1.48, p = 0.22 |
| Randomized control experiment | 12 | 0.31 | 0.14 | [0.03, 0.58] | 0.03 |  |
| **Leader of intervention** |  |  |  |  |  |  |  |
| Experimenter/researcher | 7 | 0.02 | 0.16 | [-0.29, 0.33] | 0.90 |  | Q (3) = 5.11, p = 0.16 |
| Mindfulness trainer | 5 | 0.37 | 0.20 | [-0.03, 0.76] | 0.07 |  |
| School teacher | 5 | 0.41 | 0.17 | [0.09, 0.74] | 0.01 |  |
| Mix of leader | 5 | 0.07 | 0.10 | [-0.12, 0.26] | 0.48 |  |
| **Format of intervention** |  |  |  |  |  |  |  |
| Embedded curriculum | 15 | 0.18 | 0.08 | [0.02, 0.34] | 0.02 |  | Q (1) = 0.16, p = 0.69 |
| Extra-session (outside school) | 7 | 0.27 | 0.20 | [-0.13, 0.67] | 0.19 |  |

**Table 3.** Overview of the included studies for mindfulness intervention on children’s executive functions on post-test

| **First author** | **Publication year** | **Place** | **Age (year)** | **Clinical status of the sample** | **Intervention condition** | **Control condition** | **Outcome measure** | **Reaction time (Hedges' g)** | **Accuracy (Hedges' g)** | **Follow-up assessment (Hedges' g)** |
| --- | --- | --- | --- | --- | --- | --- | --- | --- | --- | --- |
| Abdi | (2016) | Iran, Asia | 8 -10 | Typically developing | Mindful Awareness Practices (n = 16) | Passive control (n = 16) | **Working memory (2 measures):** |  |  |  |
|  |  |  |  |  |  |  | 1. Digit Span Backward | No | Yes (1.01) | No |
|  |  |  |  |  |  |  | 2. Letter-Number Sequencing | No | Yes (1.11) | No |
|  |  |  |  |  |  |  | **Inhibition (1 measure):** |  |  |  |
|  |  |  |  |  |  |  | 1. Continuous Performance Task (CPT) - Commission error | No | Yes (-0.21) | No |
|  |  |  |  |  |  |  | **Cognitive flexibility (1 measure)** |  |  |  |
|  |  |  |  |  |  |  | 1. Wisconsin Card Sorting Test - Perseverative error | No | Yes (-0.52) | No |
| Berti | (2020) | Italy, Europe | 3 - 6 | Typically developing | Mindfulness-Based Intervention (MBI) (n = 10) | Passive control (n = 11) | **Inhibition (2 measures):** |  |  |  |
|  |  |  |  |  |  |  | 1. Go/No-Go Task - No-Go trials | No | Yes (1.21) | No |
|  |  |  |  |  |  |  | 2. Head-Toes-Knees-Shoulder (HTKS) | No | Yes (0.08) | No |
| Cary | (2022) | USA, North America | 5 - 7 | Typically developing and Atypical: Specific Language Impairement (SLI) | Mindfulness Kindness Curriculum (n = 26) | Active control: "Strong Start Group" (n = 20) | **Inhibition (1 measure):** |  |  |  |
|  |  |  |  |  |  |  | 1. Head-Toes-Knees-Shoulder (HTKS) | No | Yes (-0.56) | No |
| Enoch | (2015) | USA, North America | 6 - 12 | Typically developing | Mindfulness Based Course (MBC) (n = 20) | Passive control (n = 20) | **Inhibition (2 measures):** |  |  |  |
|  |  |  |  |  |  |  | 1. Continuous Performance Test (CPT-X Task) - False alarms | No | Yes (0.83) | No |
|  |  |  |  |  |  |  | 2. Visual Cancellation Task - False alarms | No | Yes (0.84) | No |
| Esposito | (2015) | USA, North America | 6 - 10 | Atypical: diagnosed with Attention-Deficit Hyperactivity Disorder (ADHD) | Mindfulness Training (n = 33) | Passive control (n = 31) | **Inhibition (5 measures):** |  |  |  |
|  |  |  |  |  |  |  | 1. Color Flanker Task - Flanker Acc Incongruent | No | Yes (-0.36) | No |
|  |  |  |  |  |  |  | 2. Delay of Gratification | No | Yes (0.36) | No |
|  |  |  |  |  |  |  | 3. Dinky Toys Task | No | Yes (-0.36) | No |
|  |  |  |  |  |  |  | 4. Emotion Induction Go/No-Go Task - No-Go Block 1 Acc | No | Yes (-0.71) | No |
|  |  |  |  |  |  |  | 5. Emotion Induction Go/No-Go Task - No-Go Block 3 Acc | No | Yes (0.28) | No |
| Felver | (2014) | USA, North America | 9 - 12 | Typically developing | Mindful Family Stress Reduction (MFSR) (n = 22) | Passive control (n = 19) | **Inhibition (1 measure):** |  |  |  |
|  |  |  |  |  |  |  | 1. Attention Network Task (ANT) - Conflict monitoring (ms) | Yes (0.78) | No | No |
| Flook | (2015) | USA, North America | M = 4.67 | Typically developing | Mindfulness-Based Kindness Curriculum (KC) (n = 30) | Passive control (n = 38) | **Inhibition (2 measures):** |  |  |  |
|  |  |  | SD = 0.27 |  |  |  | 1. Delay of Gratification - all trials | No | Yes (0.32) | No |
|  |  |  |  |  |  |  | 2. Flanker Task | No | Yes (-0.29) | No |
|  |  |  |  |  |  |  | **Cognitive flexibility (1 measure)** |  |  |  |
|  |  |  |  |  |  |  | 1. Dimensional Change Card Sort Task (DCCS) - Post switch | No | Yes (0.35) | No |
| Flook | (2024) | USA, North America | M = 10.91 | Typically developing | Mindfulness - based on Mindfulness-based Stress Reduction (MBSR) (n = 154) | Passive control (n = 138) | **Working memory (1 measure):** |  |  |  |
|  |  |  | SD = 0.68 |  |  |  | 1. List Sort Task | No | Yes (-0.20) | No |
|  |  |  |  |  |  |  | **Inhibition (1 measure):** |  |  |  |
|  |  |  |  |  |  |  | 1. Flanker Task | Yes (-0.11) | Yes (0.07) | No |
|  |  |  |  |  |  |  | **Cognitive flexibility (1 measure)** |  |  |  |
|  |  |  |  |  |  |  | 1. Dimensional Change Card Sort Task (DCCS) | Yes (-0.14) | Yes (0.23) | No |
| Janz | (2019) | Australia | M = 78.03 | Typically developing | CalmSpace Curriculum (n = 55) | Passive control (n = 36) | **Inhibition (1 measure):** |  |  |  |
|  |  |  | SD = 10.71 |  |  |  | 1. Flanker Task | No | Yes (0.32) | Yes (0.15) |
|  |  |  |  |  |  |  | **Cognitive flexibility (1 measure)** |  |  |  |
|  |  |  |  |  |  |  | 1. Dimensional Change Card Sort Task (DCCS) | No | Yes (0.39) | Yes (0.12) |
| Koncz | (2021) | Hungary, Europe | M = 84.95 | Typically developing | Mindfulness-Based Intervention (MBI) (n = 31) | Passive control (n = 30) | **Working memory (1 measure):** |  |  |  |
| Contrast 1 (boy) |  |  | SD = 5.21 |  |  |  | 1. Corsi - Backward | No | Yes (0.10) |  |
|  |  |  |  |  |  |  | **Inhibition (1 measure):** |  |  |  |
|  |  |  |  |  |  |  | 1. Go/No-Go - Fish (commission) error | Yes (-0.22) | Yes (-0.12) | No |
|  |  |  |  |  |  |  | **Cognitive flexibility (1 measure)** |  |  |  |
|  |  |  |  |  |  |  | 1. Hearts and Flowers task - error | Yes (-0.06) | Yes (-0.09) | No |
| Koncz | (2021) | Hungary, Europe | M = 84.95 | Typically developing | Mindfulness-Based Intervention (MBI) (n = 31) | Passive control (n = 30) | **Working memory (1 measure):** |  |  |  |
| Contrast 2 (girl) |  |  | SD = 5.21 |  |  |  | 1. Corsi - Backward | No | Yes (0.68) | No |
|  |  |  |  |  |  |  | **Inhibition (1 measure):** |  |  |  |
|  |  |  |  |  |  |  | 1. Go/No-Go - Fish (commission) error | Yes (-0.32) | Yes (0.26) | No |
|  |  |  |  |  |  |  | **Cognitive flexibility (1 measure)** |  |  |  |
|  |  |  |  |  |  |  | 1. Hearts and Flowers task - error | Yes (0.12) | Yes (-0.11) | No |
| Koncz | (2022) | Hungary, Europe | M = 81.9 | Typically developing | Mindfulness-Based Relaxation Training (n = 8) | Passive control (n = 13) | **Working memory (1 measure):** |  |  |  |
| Contrast 1 (boy) |  |  | SD = 5.45 |  |  |  | 1. Digit Span - Backward | No | Yes (0.18) | No |
|  |  |  |  |  |  |  | **Cognitive flexibility (1 measure)** |  |  |  |
|  |  |  |  |  |  |  | 1. Dimensional Change Card Sort Task (DCCS) | No | Yes (0.34) | No |
| Koncz | (2022) | Hungary, Europe | M = 81.9 | Typically developing | Mindfulness-Based Relaxation Training (n = 18) | Passive control (n = 12) | **Working memory (1 measure):** |  |  |  |
| Contrast 2 (girl) |  |  | SD = 5.45 |  |  |  | 1. Digit Span - Backward | No | Yes (-0.27) | No |
|  |  |  |  |  |  |  | **Cognitive flexibility (1 measure)** |  |  |  |
|  |  |  |  |  |  |  | 1. Dimensional Change Card Sort Task (DCCS) | No | Yes (-0.01) | No |
| Lawler | (2019) | USA, North America | 6 - 10 | Typically developing | Mindfulness Training (n = 33) | Passive control (n = 31) | **Inhibition (4 measures):** |  |  |  |
|  |  |  |  |  |  |  | 1. Dinky Toys Task | No | Yes (-0.18) | No |
|  |  |  |  |  |  |  | 2. Emotion-Induction Go/No-Go Task | Yes (0.22) | Yes (-0.03) | No |
|  |  |  |  |  |  |  | 3. Flanker Task | Yes (0.13) | Yes (-0.14) | No |
|  |  |  |  |  |  |  | 4. Star Delay Task | Yes (-0.20) | No | No |
| Lertladaluck | (2021) | Thailand, Asia | M = 52.73 | Typically developing | School-Based Mindfulness (SM) Program (n = 15) | Passive control (n = 15) | **Working memory (1 measure):** |  |  |  |
|  |  |  | SD = 2.57 |  |  |  | 1. Missing Scan Task (MST) | No | Yes (0.44) | No |
|  |  |  |  |  |  |  | **Inhibition (2 measures):** |  |  |  |
|  |  |  |  |  |  |  | 1. Bear and Lion Task | No | Yes (0.31) | No |
|  |  |  |  |  |  |  | 2. Peg Tapping Task | No | Yes (0.10) | No |
|  |  |  |  |  |  |  | **Cognitive flexibility (1 measure)** |  |  |  |
|  |  |  |  |  |  |  | 1. Dimensional Change Card Sort Task (DCCS) | No | Yes (0.23) | No |
| Li | (2019) | China, Asia | 3 - 4 | Typically developing | Mindfulness Training (n = 26) | Passive control (n = 26) | **Working memory (1 measure):** |  |  |  |
|  |  |  |  |  |  |  | 1. WPPSI-VI’s Picture Memory Test | No | Yes (0.32) | No |
|  |  |  |  |  |  |  | **Inhibition (1 measure):** |  |  |  |
|  |  |  |  |  |  |  | 1. Hearts and Flowers Task | No | Yes (1.46) | No |
|  |  |  |  |  |  |  | **Cognitive flexibility (1 measure)** |  |  |  |
|  |  |  |  |  |  |  | 1. Dimensional Change Card Sort Task (DCCS) | No | Yes (1.13) | No |
| Malgahaes | (2022) | Portugal, Europe | 7 - 9 | Typically developing | Mindfulness-Based Program (n = 28) | Active control: Health Based Group (n = 27) | **Inhibition (1 measure):** |  |  |  |
|  |  |  |  |  |  |  | 1. Attention Network Task (ANT) - Conflict monitoring (ms) | Yes (-0.21) | No | No |
| Makmee | (2022) | Thailand, Asia | 7 - 12 | Typically developing | Audiovisual Mindfulness Training (n = 30) | Passive control (n = 30) | **Inhibition (2 measures):** |  |  |  |
|  |  |  |  |  |  |  | 1. Continuous Performance Task (CPT) | Yes (-0.22) | Yes (0.70) | No |
|  |  |  |  |  |  |  | **Working memory (1 measure):** |  |  |  |
|  |  |  |  |  |  |  | 2. Dual-N-back Task | Yes (-0.13) | Yes (0.84) | No |
| Muratori | (2021) | Italy, Europe | 8 - 12 | Atypical: diagnosed with ADHD and Oppositional Deficiant Disorder (ODD) | Mindfulness - “Fiore Dentro” protocol was used  (Montano & Villani, 2016) - adapted from MBSR (n = 25) | Passive control (n = 25) | **Inhibition (2 measures):** |  |  |  |
|  |  |  |  |  |  |  | 1. Bells Test-Revised - accuracy | Yes (-0.06) | Yes (1.02) | No |
|  |  |  |  |  |  |  | 2. Matching Familiar Figures test from Italian Battery for ADHD - MF-20 accuracy | Yes (0.34) | Yes (0.79) | No |
| Poehlmann-Tynan | (2016) | USA, North America | 3 - 5 | Typically developing | Mindfulness Kindness Curriculum (n = 12) | Active control: Dialog Reading (n = 12) | **Inhibition (2 measures):** |  |  |  |
|  |  |  |  |  |  |  | 1. Go/No-Go Task - correct rejections | No | Yes (0.99) | Yes (1.61) |
|  |  |  |  |  |  |  | 2. Head-Toes-Knees-Shoulder (HTKS) | No | Yes (0.19) | Yes (0.92) |
| Ramos | (2022) | USA, North America | 7 - 12 | Atypical: diagnosed with ADHD | Mindfulness-Based Therapies (MBT) + Behavior Treatment (BT) = COMB, mindfulness modified from MindUP Program (n = 29) | Active control: Behavior Treatment (n = 29) | **Working memory (1 measure):** |  |  |  |
|  |  |  |  |  |  |  | 1. NIH-TB Cognitive Toolbox - Sorting Working Memory Test | No | Yes (0.08) | No |
|  |  |  |  |  |  |  | **Inhibition (1 measure):** |  |  |  |
|  |  |  |  |  |  |  | 1. NIH-TB Cognitive Toolbox - Flanker | No | Yes (-0.30) | No |
|  |  |  |  |  |  |  | **Cognitive flexibility (1 measure)** |  |  |  |
|  |  |  |  |  |  |  | 1. NIH-TB Cognitive Toolbox - Dimensional Change Card Sort (DCCS) | No | Yes (-0.29) | No |
| Santonastaso | (2020) | Italy, Europe | 7 - 11 | Atypical: diagnosed with ADHD | Mindfulness-oriented meditation (MOM) (n = 15) | Active control: Emotion Education Program (EEP) (n = 10) | **Working memory (1 measure):** |  |  |  |
|  |  |  |  |  |  |  | 1. N-Back Task (N-Back II) - (% of error) | No | Yes (-0.23) | No |
|  |  |  |  |  |  |  | **Inhibition (3 measures):** |  |  |  |
|  |  |  |  |  |  |  | 1. Stop Signal Reaction Time (SSRT) (msec) | Yes (-0.75) | No | No |
|  |  |  |  |  |  |  | 2.Continuous Performance Test-II (CPT-II) - CPT-II HRT (msec) | Yes (-0.06) | No | No |
|  |  |  |  |  |  |  | 3. Continuous Performance Test-II (CPT-II) - CPT-II HRT-SD (msec) | Yes (0.21) | No | No |
|  |  |  |  |  |  |  | **Cognitive flexibility (1 measure)** |  |  |  |
|  |  |  |  |  |  |  | 1. Stroop Color Word Test (STROOP IES) | No | Yes (-0.26) | No |
| Schonert-Reichl | (2015) | Canada, North America | 9 - 11 | Typically developing | MindUP Program (n = 48) | Active control: Business as Usual (BAU), based on Social Responsibility Program (n = 51) | **Inhibition (2 measures):** |  |  |  |
|  |  |  |  |  |  |  | 1. Flanker Task - Flanker vs. reverse flanker | Yes (0.32) | Yes (-0.04) | No |
|  |  |  |  |  |  |  | 2. Hearts and Flowers Task - congruent vs. incongruent | Yes (0.24) | Yes (0.03) | No |
|  |  |  |  |  |  |  | **Cognitive flexibility (1 measure)** |  |  |  |
|  |  |  |  |  |  |  | 1. Flanker Task - Flanker switch | Yes (0.24) | Yes (-0.05) | No |
| Vekety | (2022) | Hungary, Europe | 9 - 10 | Typically developing | Mindfulness Training with EEG-feedback | Passive control | **Inhibition (4 measures):** |  |  |  |
|  |  |  |  |  |  |  | 1. Hearts and Flowers task - flowers block errors | Yes (-0.21) | Yes (0.66) | No |
|  |  |  |  |  |  |  | 2. Location–direction Stroop-like arrows test - Location block correct responses | Yes (-0.56) | Yes (-0.21) | No |
|  |  |  |  |  |  |  | 3. Location–direction Stroop-like arrows test - Direction block correct responses | Yes (-0.48) | Yes (-0.24) | No |
|  |  |  |  |  |  |  | 4. Stop Signal Task (SSRT) (ms) | Yes (-0.16) | No | No |
|  |  |  |  |  |  |  | **Cognitive flexibility (2 measures)** |  |  |  |
|  |  |  |  |  |  |  | 1. Hearts and Flowers task - mixed block errors | Yes (-0.19) | Yes (0.12) | No |
|  |  |  |  |  |  |  | 2. Trail Making Test (B) - errors | No | Yes (0.42) | No |
| Wimmer | (2016) | Germany, Europe | M = 10.80 | Typically developing | Mindfulness-Based Stress Reduction (MBSR) (n = 16) | Passive control (n = 10) | **Inhibition (1 measure):** |  |  |  |
|  |  |  | SD = 0.53 |  |  |  | 1. Stroop Color-Word Interference Test | No | Yes (0.38) | No |
|  |  |  |  |  |  |  | **Cognitive flexibility (2 measures)** |  |  |  |
|  |  |  |  |  |  |  | 1. Reversible Figures | No | Yes (0.17) | No |
|  |  |  |  |  |  |  | 2. Wisconsin Card Sorting Test-64 (WCST) - Perseverative errors | No | Yes (0.09) | No |
| Zelazo | (2018) | USA, North America | 3 - 5 | Typically developing | Mindfulness + Reflection Training (n = 72) | Active control: Literacy Training (n = 76) | **Inhibition (2 measures):** |  |  |  |
| Contrast 1 |  |  |  |  |  |  | 1. Head-Toes-Knees-Shoulder (HTKS) | No | Yes (0.09) | Yes (0.07) |
|  |  |  |  |  |  |  | 2. Peg Tapping Task | No | Yes (0.17) | Yes (0.41) |
| Zelazo | (2018) | USA, North America | 3 - 5 | Typically developing | Mindfulness + Reflection Training (n = 72) | Passive control: BAU (n = 68) | **Inhibition (2 measures):** |  |  |  |
| Contrast 2 |  |  |  |  |  |  | 1. Head-Toes-Knees-Shoulder (HTKS) | No | Yes (0.34) | Yes (0.39) |
|  |  |  |  |  |  |  | 2. Peg Tapping Task | No | Yes (0.30) | Yes (0.23) |
|  |  |  |  |  |  |  |  |  |  |  |

**Moderator Analyses (post-test)**

**Control group.** One study included both an active and a passive control group (Zelazo et al., 2018) that had to be excluded from this subgroup analysis. The mindfulness intervention was found to be effective when the children in the intervention group were compared to a passive control group: a small but significant positive effect was found. There was, however, no effect when the intervention was compared to an active control condition in the available five studies. The difference between the two average effect sizes was significant (Table 2)In fact, among the five studies using an active control group, only one study (Poehlmann-Tynan, 2016) that utilized Treatment as Usual-Dialog Reading (literacy skills) as an active control group found a positive, although non-significant, effect while the remaining studies found negative although non-significant effects compared to a Strong Start group ( Cary et al., 2022), a Business as Usual based on Social Responsibility Program ( Schonert-Reichl et al., 2015), a Behavior Treatment group Ramos et al., 2022) and an Emotion Education Program group ( Santonastaso et al., 2020).

**Publication year.** Publication year had no significant effect on the effect size (coefficient = -0.03,

**Continents.** After excluding the single effect size from Australia, continent was a significant moderator, (2) 10.16, 0.006. A significant, moderate-sized effect was found in Asia, while non-significant, small effects were shown in Europe and North America (Table 2). It should be noted that all the studies conducted in Asia used a passive control group. It should be noted that when compared to passive control conditions, average effect sizes in the other two continents indicated small but significant results only in Europe , while, nonsignificant in North America

**Age.** One study (Makmee, 2022) did not include mean age in the study had been excluded from the analyses.The mean age of the sample had no effect on the effect size (coefficient = 0.003, However, when we categorized the age of the sample into preschool- and school-aged, we found a significant, small-sized effect for preschool children and a small, non-significant effect for primary school children. However, this difference did not reach significance (Table 2). It should be noted that all the studies for preschool-aged children utilized embedded curriculum, school recruitment, typically developing children, and an equal gender ratio indicated similar results: a small, significant effect. In addition, excluding one study by Zelazo et al. (2018) which included both active control and passive control for preschool-aged children, we found a moderated, significant effect when compared to passive control conditions , and only one study that included active control conditions also showed a moderated but non-significant effect .

**Sex.** Two studies (Lertladaluck et al., 2021; Makmee, 2022) did not include the ratio of gender in their study had been excluded from the analyses. The ratio of males in the included studies varied between 0% to 100% although the majority of the studies focused on samples with roughly equal sex distribution. Sex ratio did not have an effect on the effect sizes (coefficient = 0.002,

**At-risk status.** A small but significant effect size was found for non-at-risk children, but no effects were found for children with an at-risk status (either a clinical diagnosis or low SES), although this moderator was not significant (Table 2). It should be noted, we found most of the studies for non-at-risk children included passive control conditions , and school recruitment reported a similar results: a small but significant effects. In addition, most non-at-risk children utilized embedded curriculum showed a small but non-significant effect. In addition, only non-at-risk preschool-aged children showed a moderated, significant effect while, non-at-risk primary school children showed a small, non-significant effect . More specifically, we found that four studies that included samples with a neurodevelopmental disorder showed a very small, non-significant effect . Similarly, the two studies with samples from low socio-economic status also resulted in a small, non-significant effect

**Recruitment.** Studies that recruited participants from schools showed a significant effect, while studies utilizing a population-based sample did not, although this difference was insignificant (Table 2). It should be noted that school recruitment only involved typically developing children, which showed a small, significant effect and only preschool children showed a small, significant effect . The majority of the studies for school recruitment included passive control conditions that indicated a small, significant effect Moreover, when school recruitment compared to the format of intervention, we found most of the studies utilized an embedded curriculum showed a small, significant effect , and only one study utilized an extracurricular but showed a large, significant effect . In addition, two studies recruited children from a clinical center, and their average effect size was similar to studies with school recruitment but it was not significant (Table 2).

**Study design.** There were 10 studies with a cluster randomized design and 12 studies that applied randomization on an individual basis. A small but significant effect only found on individual randomized design, while a small, non-significant effect found on cluster randomized design. There was no difference between the two average effect sizes (Table 2).

**Leader of intervention.** In the majority of the studies the intervention was led by a researcher (*k* = 7), while five studies utilized a mindfulness expert, five studies had the school teachers facilitate the sessions and five studies utilized a combination of at least two of these. However, only the studies in which the school teacher led the intervention reported a moderate-sized, significant average effect. The rest of the categories reported similar results: a small but non-significant effects (Table 2). It should be noted that all the studies led by school teachers only involved typically developing children and recruited from schools showed similar results: a moderate, significant effect ,. Similarly, only passive control conditions showed a moderate, significant effect . However, interventions led by school teachers reported a moderated-sized, non-significant effect when compared to preschool children , while the primary school children showed a similar non-significant, but small effect . In addition, most of the school teachers led the interventions as an embedded curriculum showed a small, non-significant effect , while, only one utilized interventions as an extracurricular showed significant, but large effect .

**Context of intervention.** 15 studies applied the intervention in the school context, includingseven studies that implemented mindfulness intervention as part of the class curriculum, three studies during regular class activities in a class setting, while five studies conducted the intervention outside of class activities but still in the school setting and hours. In contrast, seven studies reported on an extra-curricular intervention, including one study that utilized an online mindfulness intervention by using the Zoom software, two studies reporting on interventions applied in hospital settings, one study in university settings (children aged range 6-10 years old) and three studies during summer programs. Similar, small average effect sizes were found forMBIs when conducted in school or embedded in the curriculum and as an extra-curricular activities, but only showed significant in the 15 studies that applied the intervention in the school context, while the seven studies that reported on an extra-curricular intervention did not show a significant effect (Table 2). The difference between the two was not significant. Specifically, when the interventions conducted outside regular class activities but still in school settings and hours showed a moderated, significant effect , compared to during regular class activities or utilized as a class curriculum reported similar results: a small, non-significant effect. It should be noted that all the studies that applied interventions as an embedded curriculum only involved typically developing children and from school recruitments showed similar results: a small, significant effect . In addition, the embedded curriculum showed a small, significant effect on preschool children , while, for primary school children showed a small, non-significant effect . Interestingly, when the embedded curriculum compared to the categories of leader of the intervention all the studies showed similar results: a small, non-significant effect. Moreover, only when embedded curriculum compared to passive control conditions showed a small, significant effect , while active control conditions showed a negative non-significant effect size . Regarding the duration of the intervention for embedded curriculum, showed the range of the length of the intervention varied from 20 to 2700 minutes in total and the effect size was not significant (coefficient = 0.0000, In contrast, for extra-curricular (outside school activities) showed the range varied from 110 to 720 minutes in total and significant effect size (coefficient = -0.0018, In addition, the total number of sessions for embedded curriculum range varied from 5 to 42 sessions in total and non-significant effect size (coefficient = 0.005, while for extra-curricular range varied from 6 to 24 sessions in total and negative non-significant effect size (coefficient = -0.04, **Length of intervention.** One study (Janz, Dawe & Wyllie, 2019) did not include the duration of the intervention and the total number of sessions in the study so it had to be excluded from these analyses. The duration of the intervention in the included studies varied from 20 to 2700 minutes in total. After excluding one influential study (Wimmer, 2016) due to the Cook’s distance exceeding 1, the effect of the length of the intervention in minutes on the effect size was not significant (coefficient = -0.0006, The number of interventions that were conducted ranged from 5 to 42 sessions. This variable did not affect the effect size either (coefficient = -0.001,

**Mindfulness exercise types and homework**. The variability of mindfulness exercises included in the studies ranged from 1 to 10 types. For example, a study by Makmee (2020) only included one mindfulness exercise type: mindfulness sound, while Esposito et al. (2015) included 10 mindfulness exercises (e.g., mindful breathing, body scan, mindful eating, mindfulness awareness of sound, mindfulness awareness of thoughts and emotions, mindful coloring/drawing, mindful touching, mindful seeing, mindful smell, mindfulness journal). This variable had no significant effect (coefficient = -0.03, *SE* = 0.04, 95% *CI* [-0.10, 0.04], *p* = 0.41). In addition, the 17 studies did not include homework exercises showed a small, significant effect while, the five studies included homework showed a small, non-significant effect . The difference between the two was not significance.

**Figure 3**. Forest plot for the effect size for reaction time at post-test

**Reaction time (post-test)**

Overall, 11 effect sizes were reported regarding reaction time in EF tests. There was no significant effect of MBIs on reaction times in EF tests on post-test . More specifically, five studies reported on cognitive flexibility and 11 studies on inhibitory control tests . Similar, small, and non-significant average effects were found on RTs in cognitive flexibility and inhibitory control tests.

**Figure 4.** Forest plot for the effect size for accuracy at follow-up test

**Follow-up assessment (accuracy):** Overall,3 effect sizes were found regarding follow-up assessments that reported accuracy on an EF test. A moderate-sized, although non-significant, effect was found in these studies. More specifically, one study reported on follow-up assessment of cognitive flexibility and three studies on inhibitory control . None of these showed a significant result although the three studies on inhibition showed a moderate-sized average effect. However, this is a preliminary result, considering that only a few studies were available and that statistical power is likely insufficient.
